# Correction: Structural mechanism of DNA-end synapsis in the non-homologous end joining pathway for repairing double-strand breaks: bridge over troubled ends

Qian Wu

*Biochem. Soc. Trans.* (2019) 47 (6): 1609–1619 DOI: <https://doi.org/10.1042/BST20180518>

The author of this paper would like to make the following correction to the text:

In the section entitled *XRCC4, LigIV, XLF and PAXX*, the sentence which reads “Super-resolution microscopy studies showed that there were elongated repair structures in U2OS cells, having transiently-expressed XLF and XRCC4 fused with fluorescent tags [25]” should have said “Super-resolution microscopy studies showed that there were elongated repair structures in U2OS cells as XLF-XRCC4 filaments [25].”

Correction published:  
17 July 2020
